# Supplementary material for: Effect of TiO2 morphology on photovoltaic performance of dye-sensitized solar cells: nanoparticles, nanofibers, hierarchical spheres and ellipsoid spheres
Source: Royal Society of Chemistry journal article supplement (doi:10.1039/c2jm16148f), 2012-01-01
Supplement: c2jm16148f.pdf [file c2jm16148f.pdf]

## Supporting Information

# Effect of TiO<sub>2</sub> morphology on photovoltaic performance of dye-sensitized solar cells: nanoparticles, nanofibers, hierarchical spheres and ellipsoid spheres

*Jin-Yun Liao, Jun-Wen He, Huiying Xu, Dai-Bin Kuang,\* and Cheng-Yong Su*

MOE Key Laboratory of Bioinorganic and Synthetic Chemistry, KLGHEI of Environment and Energy Chemistry, State Key Laboratory of Optoelectronic Materials and Technologies, School of Chemistry and Chemical Engineering, Sun Yat-sen University, Guangzhou 510275, P. R. China.

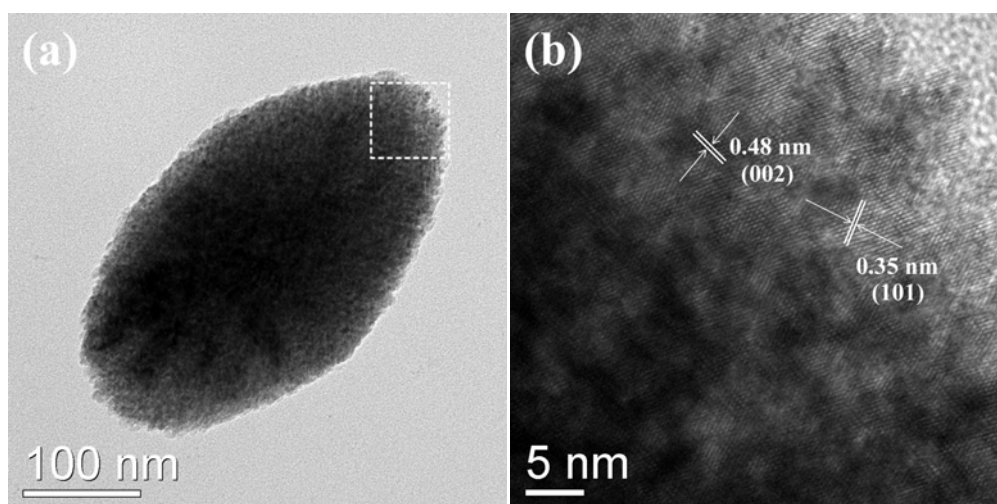

**Fig. S1** TEM images of the as-prepared anatase ellipsoid TiO<sub>2</sub> sample. Reaction condition: 1 mL TBT, 30 mL AcOH, 180 °C, 12 h.

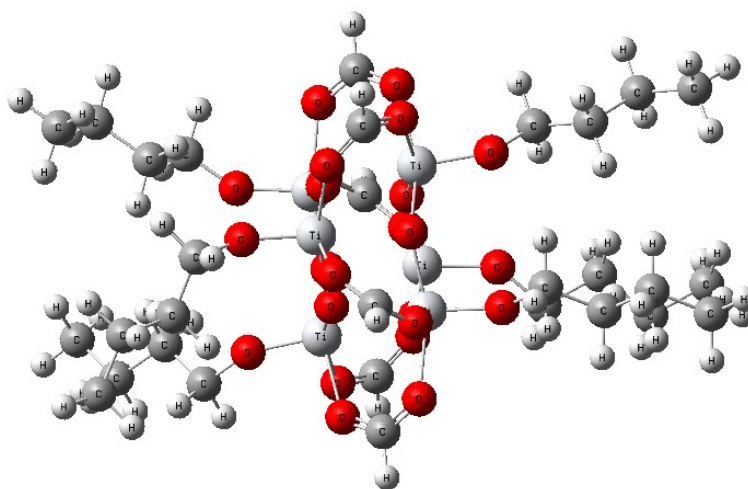

**Fig. S2** Molecular structure of  $\text{TiO}_6(\text{AcO})_6(\text{OBu})_6$  viewed along the b axes.

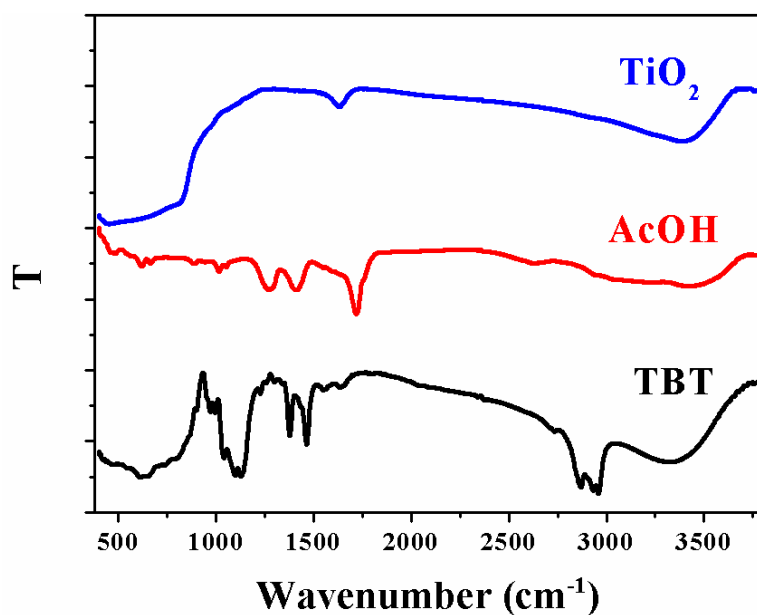

**Fig. S3** FTIR curves of AcOH, TBT and calcined anatase hierarchical TiO<sub>2</sub> sphere at 500 °C for 3 h.

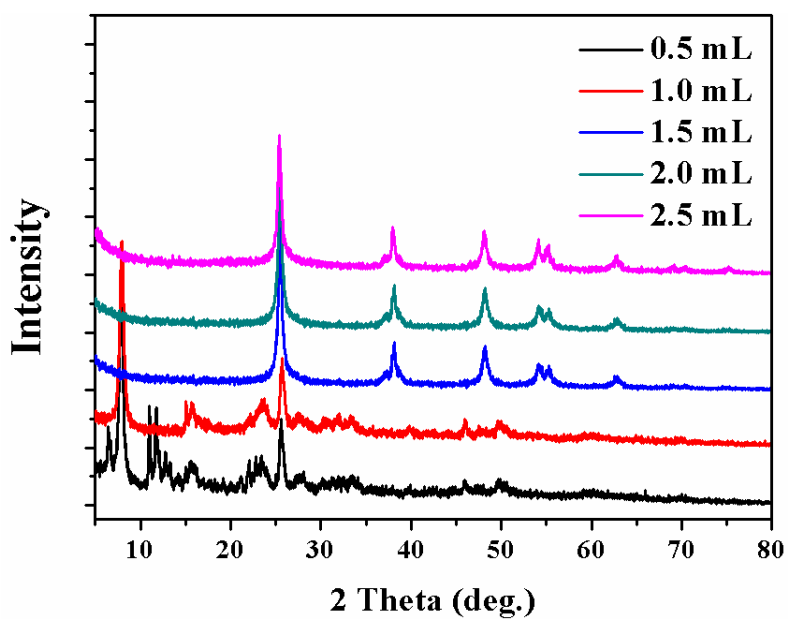

**Fig. S4** XRD patterns of as-prepared samples obtained with different TBT amount from 0.5 to 2.5 mL. Other reaction condition: 160 °C, 12 h, 30 mL AcOH.

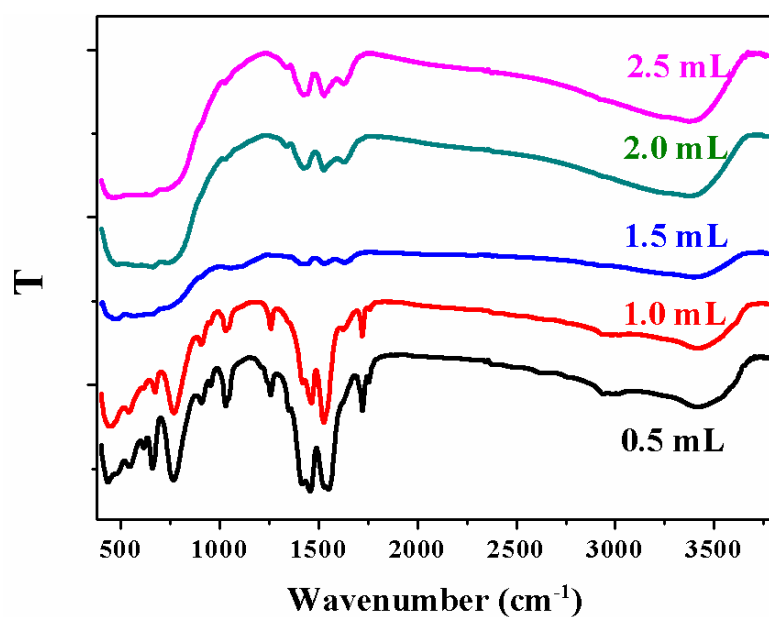

**Fig. S5** FTIR curves of as-prepared samples using different TBT amount from 0.5 to 2.5 mL (160 °C, 12 h, 30 mL AcOH).

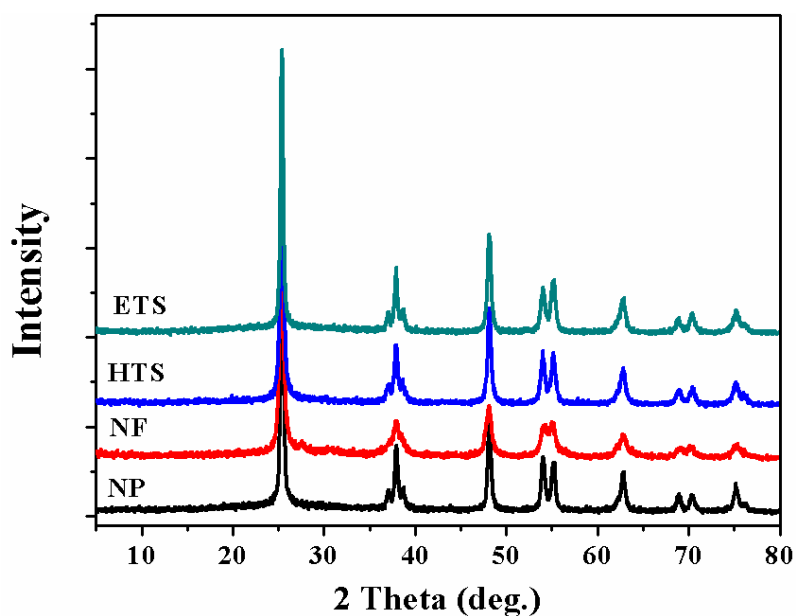

**Fig. S6** XRD patterns of nanoparticles, nanofibers, hierarchical spheres and ellipsoid spheres calcined at 500 °C for 3 h.

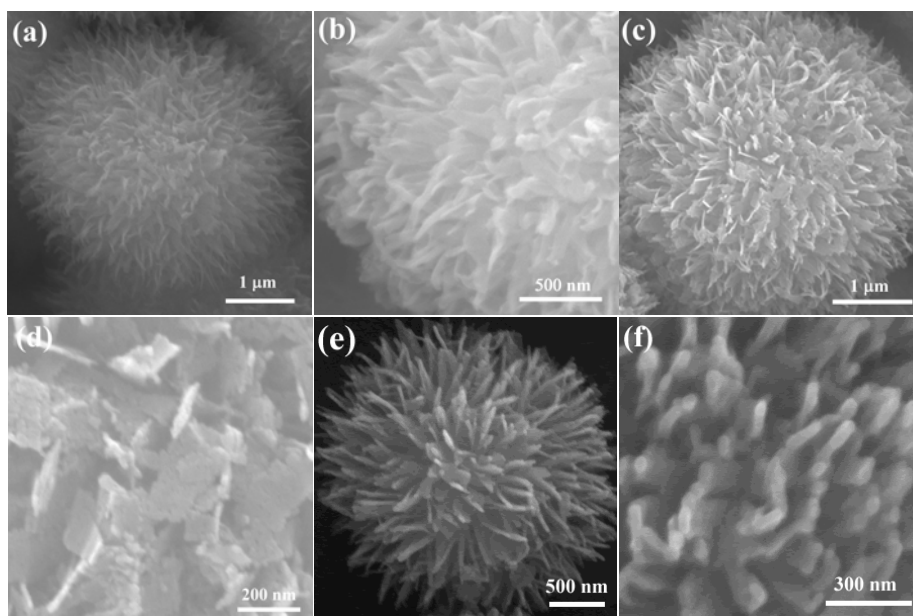

**Fig. S7** SEM images of as-prepared samples via a solvothermal reaction at 150 °C for 12 h (a, b) and the calcined hierarchical TiO<sub>2</sub> sphere at 500 °C for 3 h (c, d); single hierarchical sphere prepared at 140 °C with 1 mL TBT and 30 mL AcOH (e) and the magnification SEM images of calcined hierarchical TiO<sub>2</sub> sphere at 500 °C for 3 h.

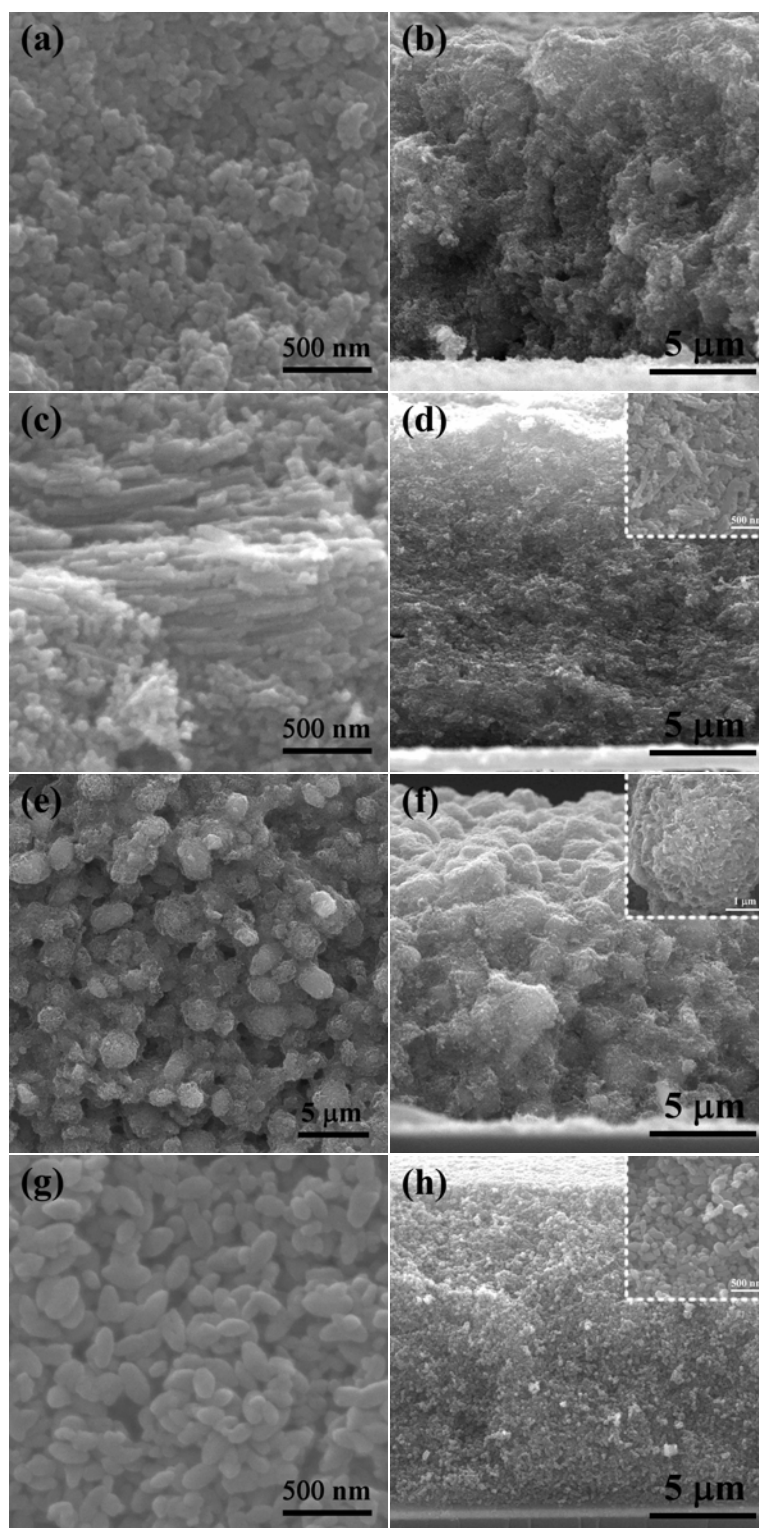

**Fig. S8** Top and cross-sectional SEM images of different TiO<sub>2</sub> electrodes: NP (a,b); NF (c, d); HTS (e, f) and ETS (g, h). Insets in (d), (f), (h) are the corresponding enlarged part of the cross-sectional SEM images.

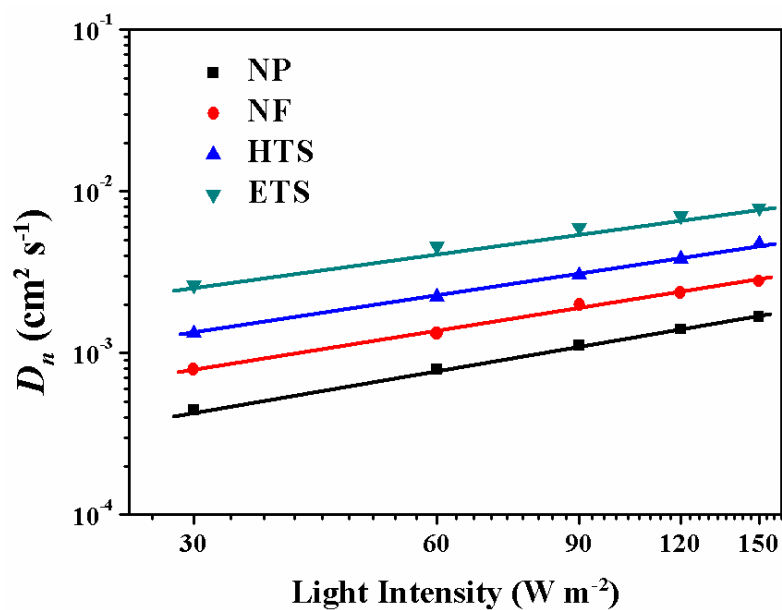

**Fig. S9** Incident light intensity dependent electron diffusion coefficient for DSSCs based on NP, NF, HTS and ETS.

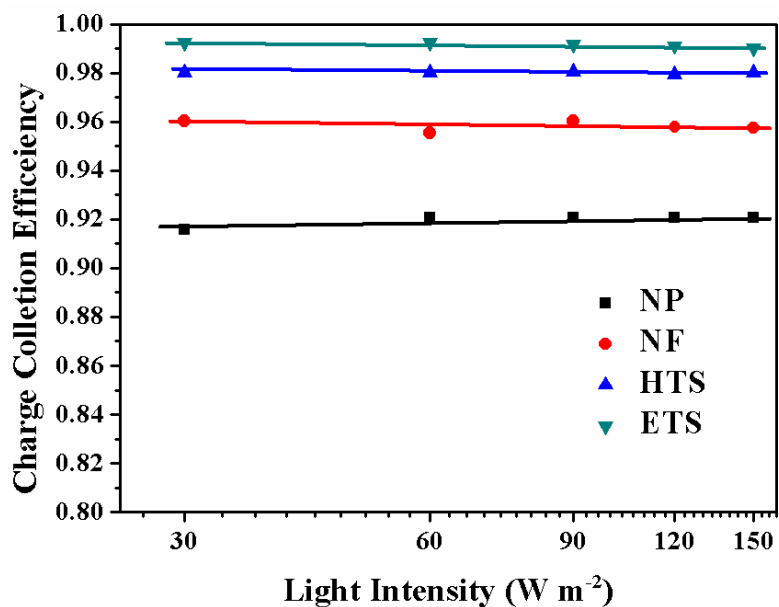

**Fig. S10** Incident light intensity dependent charge collection efficiency of DSSCs based on NP, NF, HTS and ETS.

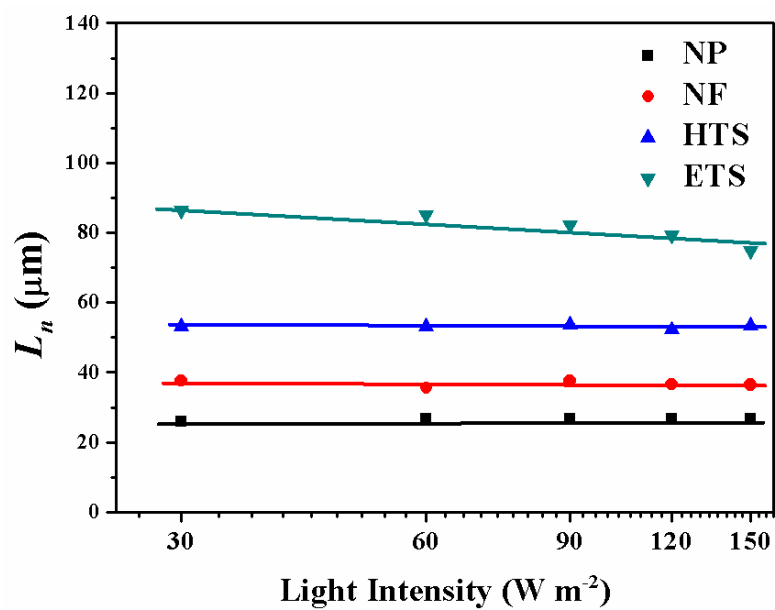

**Fig. S11** Incident light intensity dependent effective diffusion length for DSSCs based on NP, NF, HTS and ETS.
